# Supplementary material for: Electromyographic analysis of selected muscles in healthy participants wearing knee braces during activities of daily living
Source: Research Square preprint supplement (doi:10.21203/rs.3.rs-1238448/v1), 2022-04-13
Supplement: Supplementary file 1 [file cd5c6dfd3106c2caf2001cd0.docx]

Appendix 1-1:

Descriptive statistics for the normalized EMG and the knee flexion with valgus and varus braces during walking.

Valgus brace (Stance + Swing phases)

| **Valgus alignment/ Walking/ Stance phase** | **Brace parameter** | **N** | **Mean** | **SD** | **Min** | **Max** | **Valgus alignment/Walking/Swing phase** | **Brace parameter** | **N** | **Mean** | **SD** | **Min** | **Max** |
| --- | --- | --- | --- | --- | --- | --- | --- | --- | --- | --- | --- | --- | --- |
| **Vastus medialis [%]** | | | | | | **Vastus medialis [%]** | | | | | |
| WOB | 25 | 82.9 | 14.5 | 43.8 | 106.3 | WOB | 25 | 52,8 | 16,1 | 18,2 | 81,6 |
| Lv. 0 | 70,7 | 24,4 | 19,6 | 104,0 | Lv. 0 | 60,5 | 22,9 | 26,4 | 113,6 |
| Lv. 1 | 73,7 | 17,5 | 40,3 | 104,1 | Lv. 1 | 65,3 | 26,2 | 17,3 | 119,2 |
| Lv.2 | 70,4 | 22,3 | 30,1 | 109,2 | Lv.2 | 58,6 | 25,8 | 20,9 | 117,1 |
| **Biceps femoris [%]** | | | | | | **Biceps femoris [%]** | | | | | |
| WOB | 25 | 58,9 | 23,2 | 4,1 | 95,0 | WOB | 25 | 70,2 | 31,0 | 19,9 | 127,8 |
| Lv. 0 | 62,8 | 22,1 | 1,6 | 104,6 | Lv. 0 | 64,4 | 26,0 | 1,6 | 107,2 |
| Lv. 1 | 64,3 | 18,0 | 24,2 | 100,0 | Lv. 1 | 70,6 | 21,9 | 38,0 | 135,3 |
| Lv.2 | 62,9 | 20,6 | 27,5 | 110,8 | Lv.2 | 68,9 | 22,0 | 29,7 | 107,3 |
| **Gastrocnemius medialis [%]** | | | | | | **Gastrocnemius medialis [%]** | | | | | |
| WOB | 25 | 86,7 | 27,7 | 20,2 | 131,2 | WOB | 25 | 37,4 | 21,6 | 11,0 | 91,2 |
| Lv. 0 | 81,0 | 28,9 | 14,2 | 119,4 | Lv. 0 | 45,1 | 24,9 | 9,2 | 94,9 |
| Lv. 1 | 90,6 | 19,9 | 44,4 | 125,4 | Lv. 1 | 42,3 | 20,8 | 12,2 | 83,1 |
| Lv.2 | 79,1 | 25,6 | 29,3 | 129,4 | Lv.2 | 42,1 | 20,8 | 7,4 | 76,4 |
| **Anterior tibialis [%]** | | | | | | **Anterior tibialis [%]** | | | | | |
| WOB | 25 | 70,1 | 17,5 | 28,3 | 101,2 | WOB | 25 | 74,5 | 16,9 | 48,9 | 111,2 |
| Lv. 0 | 64,1 | 17,5 | 31,0 | 101,3 | Lv. 0 | 74,3 | 19,1 | 36,9 | 109,0 |
| Lv. 1 | 63,8 | 13,2 | 37,1 | 83,1 | Lv. 1 | 84,2 | 20,0 | 45,2 | 124,6 |
| Lv.2 | 68,9 | 19,5 | 35,0 | 100,0 | Lv.2 | 77,0 | 17,6 | 46,3 | 108,0 |
| **Knee flexion [%]** | | | | | | **Knee flexion [%]** | | | | | |
| WOB | 25 | 12,2 | 3,8 | 4,0 | 23,7 | WOB | 25 | 44,2 | 5,1 | 33,4 | 53,5 |
| Lv. 0 | 11,0 | 5,6 | 1,9 | 29,4 | Lv. 0 | 40,8 | 9,0 | 8,7 | 54,9 |
| Lv. 1 | 11,6 | 4,0 | 4,1 | 18,5 | Lv. 1 | 42,6 | 5,5 | 27,9 | 49,7 |
| Lv.2 | 12,9 | 3,9 | 4,9 | 18,6 | Lv.2 | 43,0 | 6,2 | 28,5 | 49,3 |

Appendix 1-2:

Descriptive statistics for the normalized EMG and the knee flexion with valgus and varus braces during walking.

Varus brace (Stance + Swing phases).

| **Varus alignment/ Walking/Stance phase** | **Brace parameter** | **N** | **Mean** | **SD** | **Min** | **Max** | **Varus alignment/Walking/Swing phase** | **Brace parameter** | **N** | **Mean** | **SD** | **Min** | **Max** |
| --- | --- | --- | --- | --- | --- | --- | --- | --- | --- | --- | --- | --- | --- |
| **Vastus medialis [%]** | | | | | | **Vastus medialis [%]** | | | | | |
| WOB | 25 | 82.9 | 14.5 | 43.8 | 106.3 | WOB | 25 | 52,8 | 16,1 | 18,2 | 81,6 |
| Lv. 0 | 67,8 | 25,2 | 26,4 | 126,2 | Lv. 0 | 60,6 | 30,5 | 15,0 | 136,4 |
| Lv. 1 | 68,4 | 17,1 | 39,2 | 96,2 | Lv. 1 | 65,2 | 28,5 | 12,3 | 134,4 |
| Lv.2 | 69,1 | 22,9 | 23,4 | 101,3 | Lv.2 | 65,1 | 28,4 | 15,6 | 122,4 |
| **Biceps femoris [%]** | | | | | | **Biceps femoris [%]** | | | | | |
| WOB | 25 | 58,9 | 23,2 | 4,1 | 95,0 | WOB | 25 | 70,2 | 31,0 | 19,9 | 127,8 |
| Lv. 0 | 62,6 | 18,2 | 19,3 | 100,0 | Lv. 0 | 70,0 | 21,3 | 34,9 | 107,7 |
| Lv. 1 | 62,0 | 19,7 | 28,8 | 98,0 | Lv. 1 | 70,7 | 17,4 | 29,0 | 98,4 |
| Lv.2 | 66,3 | 19,5 | 25,0 | 98,0 | Lv.2 | 67,2 | 18,4 | 34,2 | 111,8 |
| **Gastrocnemius medialis[%]** | | | | | | **Gastrocnemius medialis [%]** | | | | | |
| WOB | 25 | 86,7 | 27,7 | 20,2 | 131,2 | WOB | 25 | 37,4 | 21,6 | 11,0 | 91,2 |
| Lv. 0 | 83,0 | 24,5 | 29,0 | 121,1 | Lv. 0 | 37,1 | 22,1 | 5,8 | 90,5 |
| Lv. 1 | 83,5 | 25,7 | 34,8 | 130,0 | Lv. 1 | 42,5 | 21,9 | 6,0 | 92,4 |
| Lv.2 | 79,9 | 28,2 | 10,2 | 137,0 | Lv.2 | 40,4 | 22,3 | 10,8 | 85,7 |
| **Anterior tibialis [%]** | | | | | | **Anterior tibialis [%]** | | | | | |
| WOB | 25 | 70,1 | 17,5 | 28,3 | 101,2 | WOB | 25 | 74,5 | 16,9 | 48,9 | 111,2 |
| Lv. 0 | 64,9 | 12,9 | 35,7 | 93,2 | Lv. 0 | 74,9 | 18,8 | 34,7 | 131,0 |
| Lv. 1 | 64,2 | 14,6 | 35,6 | 96,6 | Lv. 1 | 73,5 | 17,5 | 35,8 | 104,9 |
| Lv.2 | 67,9 | 17,6 | 27,3 | 96,0 | Lv.2 | 75,1 | 19,3 | 37,5 | 125,1 |
| **Knee flexion [%]** | | | | | | **Knee flexion [%]** | | | | | |
| WOB | 25 | 12,2 | 3,8 | 4,0 | 23,7 | WOB | 25 | 44,2 | 5,1 | 33,4 | 53,5 |
| Lv. 0 | 10,2 | 4,0 | 1,3 | 16,0 | Lv. 0 | 40,9 | 6,6 | 20,0 | 50,2 |
| Lv. 1 | 10,5 | 4,2 | 2,5 | 17,6 | Lv. 1 | 40,8 | 6,8 | 20,0 | 48,5 |
| Lv.2 | 10,3 | 3,9 | 3,2 | 16,7 | Lv.2 | 41,2 | 5,2 | 29,8 | 49,4 |

Appendix 2-1:

Descriptive statistics for the normalized EMG and the knee flexion with valgus and varus braces during stair climbing.

| **Valgus alignment/Stair climbing/Stance phase** | **Brace parameter** | **N** | **Mean** | **SD** | **Min** | **Max** | **Valgus alignment/Stair climbing/Swing phase** | **Brace parameter** | **N** | **Mean** | **SD** | **Min** | **Max** |
| --- | --- | --- | --- | --- | --- | --- | --- | --- | --- | --- | --- | --- | --- |
| **Vastus medialis [%]** | | | | | | **Vastus medialis [%]** | | | | | |
| WOB | 25 | 93,9 | 16,6 | 55,8 | 130,6 | WOB | 25 | 23,7 | 10,5 | 5,5 | 38,6 |
| Lv. 0 | 83,3 | 17,8 | 57,3 | 111,1 | Lv. 0 | 35,9 | 20,6 | 7,6 | 87,4 |
| Lv. 1 | 85,6 | 18,6 | 55,1 | 112,5 | Lv. 1 | 39,5 | 24,7 | 10,9 | 120,3 |
| Lv.2 | 85,0 | 18,4 | 48,8 | 119,7 | Lv.2 | 37,8 | 22,1 | 7,9 | 99,0 |
| **Biceps femoris [%]** | | | | | | **Biceps femoris [%]** | | | | | |
| WOB | 25 | 58,3 | 11,7 | 35,8 | 77,6 | WOB | 25 | 75,2 | 22,0 | 27,0 | 110,9 |
| Lv. 0 | 64,1 | 13,7 | 32,6 | 94,8 | Lv. 0 | 74,4 | 20,1 | 36,2 | 109,0 |
| Lv. 1 | 62,9 | 13,6 | 33,0 | 85,1 | Lv. 1 | 78,6 | 21,6 | 22,1 | 110,7 |
| Lv.2 | 63,0 | 13,2 | 28,5 | 89,2 | Lv.2 | 78,9 | 17,1 | 41,3 | 107,4 |
| **Gastrocnemius medialis [%]** | | | | | | **Gastrocnemius medialis [%]** | | | | | |
| WOB | 25 | 85,7 | 18,9 | 40,3 | 116,4 | WOB | 25 | 40,9 | 18,1 | 17,0 | 113,5 |
| Lv. 0 | 82,3 | 18,3 | 46,9 | 108,5 | Lv. 0 | 46,2 | 28,0 | 10,2 | 124,9 |
| Lv. 1 | 86,1 | 19,7 | 43,9 | 118,6 | Lv. 1 | 48,7 | 27,1 | 16,3 | 123,6 |
| Lv.2 | 78,0 | 21,1 | 42,1 | 110,3 | Lv.2 | 49,3 | 23,6 | 14,1 | 114,2 |
| **Anterior tibialis [%]** | | | | | | **Anterior tibialis [%]** | | | | | |
| WOB | 25 | 55,9 | 15,3 | 32,9 | 86,0 | WOB | 25 | 91,9 | 17,8 | 62,5 | 121,6 |
| Lv. 0 | 51,4 | 16,8 | 26,4 | 85,2 | Lv. 0 | 97,2 | 23,1 | 37,1 | 138,7 |
| Lv. 1 | 54,5 | 18,8 | 27,3 | 93,4 | Lv. 1 | 89,6 | 25,7 | 24,4 | 128,7 |
| Lv.2 | 52,3 | 14,7 | 31,9 | 90,4 | Lv.2 | 96,1 | 18,1 | 68,1 | 133,7 |
| **Knee flexion [%]** | | | | | | **Knee flexion [%]** | | | | | |
| WOB | 25 | 39,7 | 7,5 | 28,8 | 56,2 | WOB | 25 | 72,4 | 8,2 | 55,0 | 86,2 |
| Lv. 0 | 39,0 | 6,4 | 27,9 | 54,9 | Lv. 0 | 69,6 | 12,5 | 47,6 | 88,2 |
| Lv. 1 | 40,3 | 8,0 | 26,3 | 62,9 | Lv. 1 | 68,2 | 12,2 | 43,9 | 89,9 |
| Lv.2 | 41,6 | 7,7 | 30,3 | 61,9 | Lv.2 | 68,2 | 11,9 | 47,3 | 90,0 |

Valgus brace (Stance + Swing phases)

Appendix 2-2:

Descriptive statistics for the normalized EMG and the knee flexion with valgus and varus braces during stair climbing.

| **Varus alignment/Stair climbing/Stance phase** | **Brace parameter** | **N** | **Mean** | **SD** | **Min** | **Max** | **Varus alignment/Stair climbing/Swing phase** | **Brace parameter** | **N** | **Mean** | **SD** | **Min** | **Max** |
| --- | --- | --- | --- | --- | --- | --- | --- | --- | --- | --- | --- | --- | --- |
| Vastus medialis [%] | | | | | | Vastus medialis [%] | | | | | |
| WOB | 25 | 93,9 | 16,6 | 55,8 | 130,6 | WOB | 25 | 23,7 | 10,5 | 5,5 | 38,6 |
| Lv. 0 | 86,4 | 14,6 | 58,8 | 110,8 | Lv. 0 | 41,1 | 26,0 | 8,4 | 100,6 |
| Lv. 1 | 84,1 | 18,5 | 49,3 | 111,6 | Lv. 1 | 44,4 | 29,4 | 5,8 | 132,2 |
| Lv.2 | 81,4 | 15,5 | 36,9 | 106,9 | Lv.2 | 45,5 | 27,9 | 8,7 | 109,2 |
| Biceps femoris [%] | | | | | | Biceps femoris [%] | | | | | |
| WOB | 25 | 58,3 | 11,7 | 35,8 | 77,6 | WOB | 25 | 75,2 | 22,0 | 27,0 | 110,9 |
| Lv. 0 | 65,7 | 13,6 | 39,2 | 100,9 | Lv. 0 | 82,8 | 17,0 | 44,2 | 113,0 |
| Lv. 1 | 67,9 | 13,4 | 46,9 | 101,8 | Lv. 1 | 78,3 | 14,2 | 51,1 | 98,3 |
| Lv.2 | 64,5 | 9,3 | 47,1 | 80,5 | Lv.2 | 75,3 | 12,0 | 41,6 | 91,9 |
| Gastrocnemius medialis [%] | | | | | | Gastrocnemius medialis [%] | | | | | |
| WOB | 25 | 85,7 | 18,9 | 40,3 | 116,4 | WOB | 25 | 40,9 | 18,1 | 17,0 | 113,5 |
| Lv. 0 | 85,6 | 12,3 | 55,6 | 110,1 | Lv. 0 | 46,8 | 17,4 | 18,5 | 88,3 |
| Lv. 1 | 84,3 | 19,9 | 45,4 | 112,8 | Lv. 1 | 45,9 | 22,0 | 13,6 | 102,9 |
| Lv.2 | 81,1 | 20,3 | 25,6 | 121,6 | Lv.2 | 45,5 | 24,1 | 7,9 | 92,3 |
| Anterior tibialis [%] | | | | | | Anterior tibialis [%] | | | | | |
| WOB | 25 | 55,9 | 15,3 | 32,9 | 86,0 | WOB | 25 | 91,9 | 17,8 | 62,5 | 121,6 |
| Lv. 0 | 52,8 | 15,5 | 27,4 | 86,9 | Lv. 0 | 95,5 | 17,3 | 63,2 | 135,8 |
| Lv. 1 | 56,9 | 13,7 | 32,3 | 79,6 | Lv. 1 | 96,7 | 22,0 | 50,6 | 137,5 |
| Lv.2 | 56,2 | 18,2 | 20,8 | 101,1 | Lv.2 | 93,7 | 18,2 | 59,2 | 131,5 |
| Knee flexion [%] | | | | | | Knee flexion [%] | | | | | |
| WOB | 25 | 39,7 | 7,5 | 28,8 | 56,2 | WOB | 25 | 72,4 | 8,2 | 55,0 | 86,2 |
| Lv. 0 | 40,5 | 8,5 | 28,5 | 61,0 | Lv. 0 | 68,9 | 12,8 | 42,2 | 94,8 |
| Lv. 1 | 39,7 | 7,0 | 27,3 | 60,7 | Lv. 1 | 71,0 | 8,4 | 54,4 | 87,8 |
| Lv.2 | 42,2 | 9,4 | 25,8 | 65,9 | Lv.2 | 68,7 | 11,0 | 47,0 | 89,2 |

Varus brace (Stance + Swing phases).
